# Supplementary material
Source: PubMed Central journal article supplement (PMC6878214)
Supplement: an9b01869_si_001.pdf [file an9b01869_si_001.pdf]

*Supporting Information*

**Femtosecond Laser-Produced Underwater “Superpolymphobic”  
Nanorippled Surfaces: Repelling Liquid Polymers in Water for  
Applications of Controlling Polymer Shape and Adhesion**

*Jiale Yong<sup>1,2</sup>, Subhash C. Singh<sup>1</sup>, Zhibing Zhan<sup>1</sup>, Mohamed EIKabbash<sup>1</sup>, Feng Chen<sup>2,\*</sup>, Chunlei Guo<sup>1,\*</sup>*

<sup>1</sup>The Institute of Optics, University of Rochester, Rochester, New York, 14627, USA

<sup>2</sup>Shaanxi Key Laboratory of Photonics Technology for Information, School of Electronics & Information Engineering, Xi'an Jiaotong University, Xi'an, 710049, PR China

\*Corresponding author: guo@optics.rochester.edu (C.G.)  
chenfeng@mail.xjtu.edu.cn (F.C.)

**Including Movie S1 and S2, and Figure S1~S4.**

**Movie S1.** Process of a small water droplet spreading out on the laser-induced rough surface in air.

**Movie S2.** Process of an underwater liquid PDMS droplet being moved to contact and leave the rough stainless steel surface.

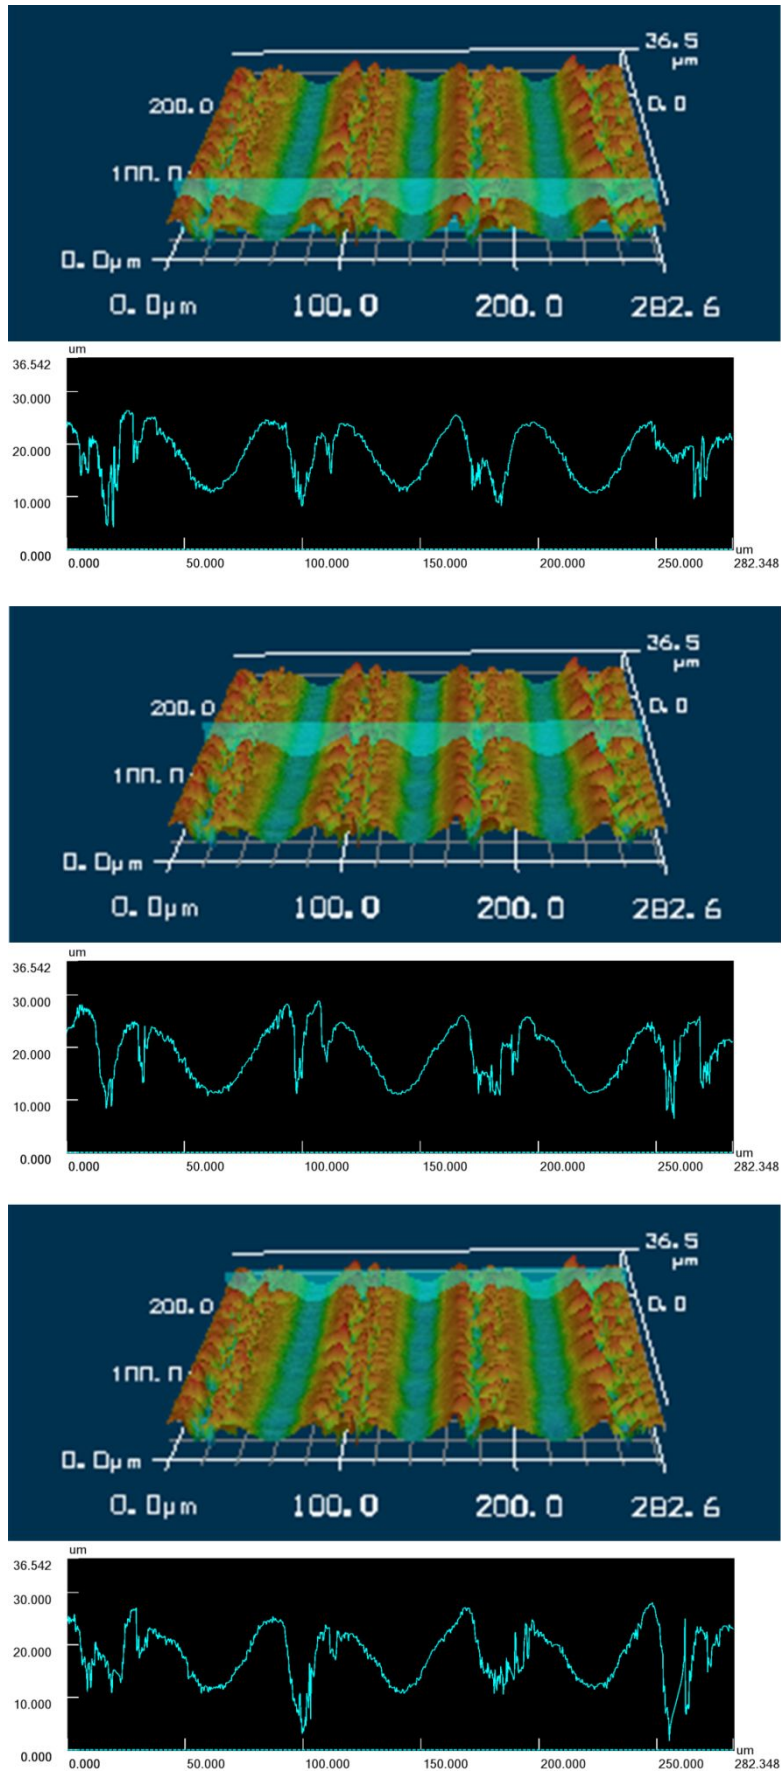

**Figure S1.** Cross-sectional profiles of the laser-induced microgrooves array at different location.

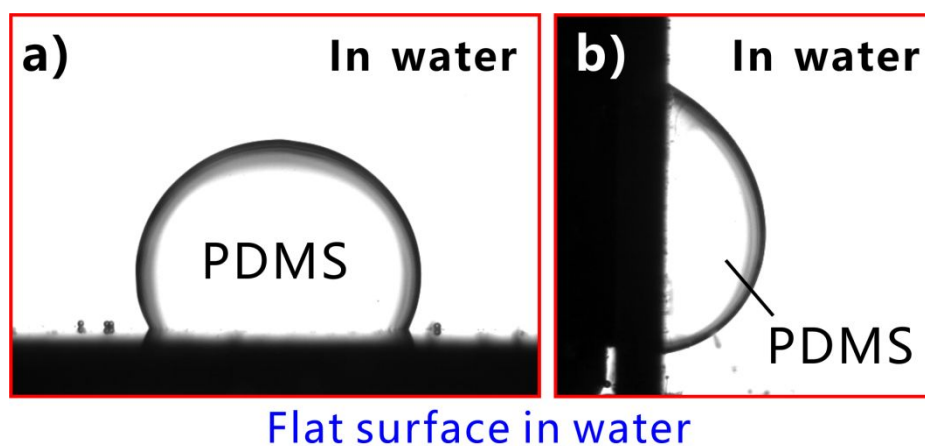

**Figure S2.** (a) Underwater PDMS liquid droplet on the flat stainless steel surface. (b) Underwater liquid PDMS droplet adhering to the flat stainless steel substrate.

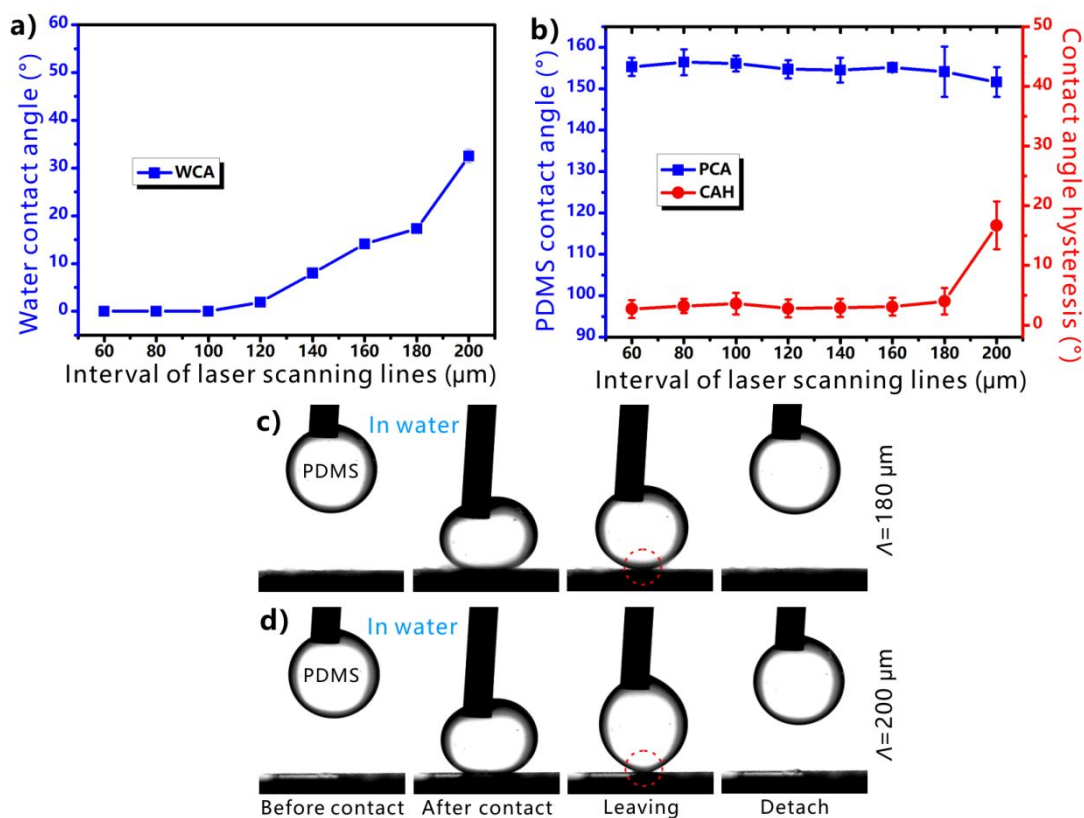

**Figure S3.** Influence of the adopted interval of the laser scanning lines on the wettability of the laser-ablated stainless steel surfaces. (a) Water wettability. (b) Wettability of a liquid PDMS droplet on the sample surfaces in water. (c,d) Process of an underwater PDMS droplet being moved to contact and leave the rough stainless steel surfaces: (c)  $\Lambda = 180 \mu\text{m}$  and (d)  $\Lambda = 200 \mu\text{m}$ .

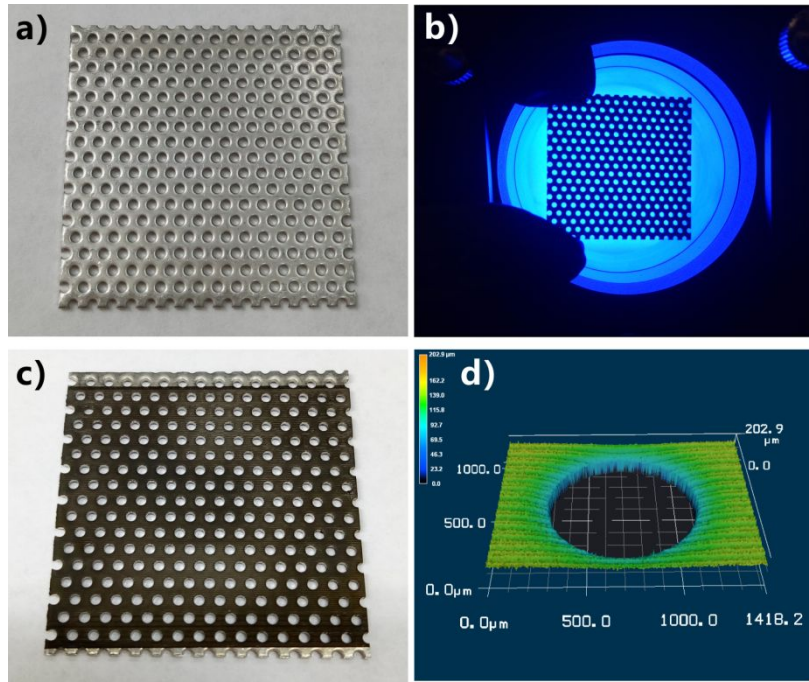

**Figure S4.** Images of the porous stainless steel sheet before and after femtosecond laser ablation. (a) Photograph of an original porous sheet. (b) Transmission photograph of an original porous illuminated by a backlight. (c) Photograph of a laser-ablated porous sheet. The color of the laser-ablated area becomes black. (d) 3D profile of a single microhole on the laser-ablated stainless steel sheet.
